# Supplementary material
Source: publisher figshare collection journal article supplement (https://tandf.figshare.com/ndownloader/files/28533945)
Supplement: Supplementary file 1 [file 28533945]

## Appendix

**Table A1:** Mapping of detailed CLC classes to land use aggregates

| CLC code | Description                                                   | Aggregate  |              |
|----------|---------------------------------------------------------------|------------|--------------|
| 111      | Continuous urban fabric                                       | Settlement | Urban        |
| 112      | Discontinuous urban fabric                                    | Settlement | Urban        |
| 121      | Industrial or commercial units                                | Artificial | Urban        |
| 122      | Road and rail networks and associated land                    | Artificial | Urban        |
| 123      | Port areas                                                    | Artificial | Urban        |
| 124      | Airports                                                      | Artificial | Urban        |
| 131      | Mineral extraction sites                                      | Artificial | Urban        |
| 132      | Dump sites                                                    | Artificial | Urban        |
| 133      | Construction sites                                            | Artificial | Urban        |
| 141      | Green urban areas                                             | Artificial | Urban        |
| 142      | Sport and leisure facilities                                  | Artificial | Urban        |
| 211      | Non-irrigated arable land                                     | Cropland   | Agricultural |
| 212      | Permanently irrigated land                                    | Cropland   | Agricultural |
| 213      | Rice fields                                                   | Cropland   | Agricultural |
| 221      | Vineyards                                                     | Cropland   | Agricultural |
| 222      | Fruit trees and berry plantations                             | Cropland   | Agricultural |
| 223      | Olive groves                                                  | Cropland   | Agricultural |
| 231      | Pastures                                                      | Grassland  | Agricultural |
| 241      | Annual crops associated with permanent crops                  | Cropland   | Agricultural |
| 242      | Complex cultivation patterns                                  | Cropland   | Agricultural |
| 243      | Land principally occupied by agriculture & natural vegetation | Forest     |              |
| 244      | Agro-forestry areas                                           | Forest     |              |
| 311      | Broad-leaved forest                                           | Forest     |              |
| 312      | Coniferous forest                                             | Forest     |              |
| 313      | Mixed forest                                                  | Forest     |              |
| 321      | Natural grasslands                                            | Other      |              |
| 322      | Moors and heathland                                           | Other      |              |
| 323      | Sclerophyllous vegetation                                     | Other      |              |
| 324      | Transitional woodland-shrub                                   | Other      |              |
| 331      | Beaches dunes sands                                           | Other      |              |
| 332      | Bare rocks                                                    | Other      |              |
| 333      | Sparsely vegetated areas                                      | Other      |              |
| 334      | Burnt areas                                                   | Other      |              |
| 335      | Glaciers and perpetual snow                                   | Excluded   |              |
| 415      | Inland marshes                                                | Excluded   |              |
| 412      | Peat bogs                                                     | Excluded   |              |
| 421      | Salt marshes                                                  | Excluded   |              |
| 422      | Salines                                                       | Excluded   |              |
| 423      | Intertidal flats                                              | Excluded   |              |
| 511      | Water courses                                                 | Excluded   |              |
| 512      | Water bodies                                                  | Excluded   |              |
| 521      | Coastal lagoons                                               | Excluded   |              |
| 522      | Estuaries                                                     | Excluded   |              |
| 523      | Sea and ocean                                                 | Excluded   |              |
| 999      | No data                                                       | Excluded   |              |

## Marginal effects

Similar to the marginal effects of the spatial Durbin logit model (see [Krisztin and Piribauer, 2020](#)), in the presented multinomial logit model the interpretation of marginal effects of the  $k$ -th explanatory variable (with  $k = 1, \dots, K$ ) differs from those in linear models. This is due to the fact that the multinomial logit model is non-linear in nature, but also the the presence of spatial autocorrelation gives rise to an  $N \times N$  matrix of partial derivatives, which makes interpretation of marginal effects richer, but also more complicated (see also [LeSage and Pace 2009](#)).

As is standard in the logit literature, and analogous with the proposed marginal effects of the spatial logit model ([Krisztin and Piribauer, 2020](#)), we provide marginal effects relative to the mean of the  $k$ -th explanatory variable, which we denote as  $\bar{x}_k = \sum_{i=1}^N x_{ik} / N$ .<sup>1</sup> Thus the interpretation of the marginal effects is the change in probability of observing  $y = j$  associated with a change in the average sample observation of the  $k$ -th explanatory variable. To write the partial derivatives of the model, with respect to the  $k$ -th coefficient let us define:

$$\begin{aligned}\boldsymbol{\mu}_{kj} &= \mathbf{A}_j^{-1} \mathbf{I}_N \bar{x}_k \boldsymbol{\beta}_{kj} + \mathbf{A}_j^{-1} \bar{x}_{Wk} \boldsymbol{\theta}_{kj}, \\ \boldsymbol{\zeta}_{kj} &= \mathbf{A}_j^{-1} \mathbf{I}_N \boldsymbol{\beta}_{kj} + \mathbf{A}_j^{-1} \mathbf{W} \boldsymbol{\theta}_{kj}, \text{ and} \\ \mathbf{p}_{kj} &= \frac{\exp \boldsymbol{\mu}_{kj}}{\sum_{j'}^J \exp(\boldsymbol{\mu}_{kj'})}.\end{aligned}$$

$\boldsymbol{\beta}_{kj}$  and  $\boldsymbol{\theta}_{kj}$  denote the  $k$ -th element of  $\boldsymbol{\beta}_j$  and  $\boldsymbol{\theta}_j$ , respectively.  $\bar{x}_{Wk}$  denotes the average value of the  $k$ -th spatially lagged explanatory variable. The partial derivatives can then be expressed as:

$$\begin{aligned}\frac{\partial p(y = j | \bar{x}_k)}{\partial \bar{x}_k} &= \mathbf{p}_{kj} \odot \left[ \boldsymbol{\zeta}_{kj} - \sum_{j'}^J \mathbf{p}_{kj'} \odot \boldsymbol{\zeta}_{kj'} \right], \\ &= \boldsymbol{\Lambda}_{kj},\end{aligned}\tag{1}$$

where  $\odot$  is the Hadamard product. Note that marginal effects of the  $k$ -th coefficient on class  $j$ , denoted as  $\boldsymbol{\Lambda}_{kj}$ , are an  $N \times N$  matrix due to the presence of the  $N \times N$  spatial multiplier  $\mathbf{A}_j^{-1}$ .

Interpreting  $N \times N$  marginal effects proves cumbersome, therefore we define summary impact effects (LeSage and Pace, 2009). These can be readily calculated from  $\Lambda_{kj}$ :

$$direct_{kj} = \frac{1}{N} \mathbf{t}'_N diag(\Lambda_{kj}) \quad (2)$$

$$total_{kj} = \frac{1}{N} \mathbf{t}'_N \Lambda_{kj} \mathbf{t}_N \quad (3)$$

$$indirect_{kj} = total_{kj} - direct_{kj}, \quad (4)$$

where  $\mathbf{t}_N$  denotes an  $N \times 1$  vector of ones.

## Notes

<sup>1</sup>While herein we focus on marginal effects relative to the means of the explanatory variables, the marginal effects can be also calculated at the actual levels of the explanatory variables. As remarked by Lacombe and LeSage (2018), due to the non-linearity of the multinomial logit model, the marginal effects at the actual levels might be sufficiently different from the marginal effects at the means. Note, that the summary impact effects presented in this appendix can be adopted to accommodate marginal effects at the levels of the explanatory variables with ease, by exchanging the mean  $\bar{x}_k$  in Eq. (1) with the level of the explanatory variable under scrutiny.

## References

- Krisztin T and Piribauer P (2020) A Bayesian spatial autoregressive logit model with an empirical application to European regional FDI flows. *Empirical Economics*
- Lacombe DJ and LeSage JP (2018) Use and interpretation of spatial autoregressive probit models. *The Annals of Regional Science* 60(1), 1–24
- LeSage JP and Pace RK (2009) *Introduction to Spatial Econometrics*. CRC Press, Boca Raton London New York
